# Supplementary material
Source: PubMed Central journal article supplement (PMC6641952)
Supplement: ao7b00964_si_001.pdf [file ao7b00964_si_001.pdf]

# Supporting Information

## Structure-Property Relationships of Poly(ethylene carbonate) and Poly(propylene carbonate)

Yuji Sasanuma\* and Yuta Takahashi

Department of Applied Chemistry and Biotechnology, Graduate School and Faculty of Engineering, Chiba University  
1-33 Yayoi-cho, Inage-ku, Chiba 263-8522, Japan

### Appendix A. Statistical weight matrices $U_j$ 's of poly(ethylene carbonate) (PEC).

For bond numbers of PEC, see Figure 1. Herein, the symbol  $\otimes$  stands for direct product.

$$U_1 = U_2 = U_3 = C_1 \otimes R_1 \quad (\text{A1})$$

$$U_4 = C_1 \otimes R_3 \quad (\text{A2})$$

$$U_5 = I_3 \otimes R_3 \quad (\text{A3})$$

$$U_6 = \begin{pmatrix} u_{ttt} & u_{ttg^+} & u_{ttg^-} & 0 & 0 & 0 & 0 & 0 & 0 \\ 0 & 0 & 0 & u_{tg^+t} & u_{tg^+g^+} & u_{tg^+g^-} & 0 & 0 & 0 \\ 0 & 0 & 0 & 0 & 0 & 0 & u_{tg^-t} & u_{tg^-g^+} & u_{tg^-g^-} \\ u_{g^+tt} & u_{g^+tg^+} & u_{g^+tg^-} & 0 & 0 & 0 & 0 & 0 & 0 \\ 0 & 0 & 0 & u_{g^+g^+t} & u_{g^+g^+g^+} & u_{g^+g^+g^-} & 0 & 0 & 0 \\ 0 & 0 & 0 & 0 & 0 & 0 & u_{g^+g^-t} & u_{g^+g^-g^+} & u_{g^+g^-g^-} \\ u_{g^-tt} & u_{g^-tg^+} & u_{g^-tg^-} & 0 & 0 & 0 & 0 & 0 & 0 \\ 0 & 0 & 0 & u_{g^-g^+t} & u_{g^-g^+g^+} & u_{g^-g^+g^-} & 0 & 0 & 0 \\ 0 & 0 & 0 & 0 & 0 & 0 & u_{g^-g^-t} & u_{g^-g^-g^+} & u_{g^-g^-g^-} \end{pmatrix} \quad (\text{A4})$$

$$U_a = C_3 \otimes I_3 \otimes R_1 \quad (\text{A5})$$

The  $U_b$  and  $U_c$  matrices are  $9 \times 9$  in size. The (1,1), (4,1), and (7,1) elements of  $U_b$  are unity, and the others are null. The (1,1), (1,2), and (1,3) elements of  $U_c$  are unity, and the others are null.

$$U_d = C_1 \otimes U_5 \quad (\text{A6})$$

$$U_e = U_6 \quad (\text{A7})$$

$$U_1 = U_a \quad (\text{A8})$$

$$U_m = U_b \quad (\text{A9})$$

and

$$U_n = U_c \quad (\text{A10})$$

where

$$C_1 = \begin{pmatrix} 1 \\ 0 \\ 0 \end{pmatrix} \quad (\text{A11})$$

$$C_3 = \begin{pmatrix} 1 \\ 1 \\ 1 \end{pmatrix} \quad (\text{A12})$$

$$R_1 = \begin{pmatrix} 1 & 0 & 0 \end{pmatrix} \quad (\text{A13})$$

$$R_3 = \begin{pmatrix} 1 & 1 & 1 \end{pmatrix} \quad (\text{A14})$$

and

$$I_3 = \begin{pmatrix} 1 & 0 & 0 \\ 0 & 1 & 0 \\ 0 & 0 & 1 \end{pmatrix} \quad (\text{A15})$$

For example, the element  $u_{\text{tg}^+\text{g}^-}$  of the  $U_6$  matrix is the Boltzmann factor of the corresponding conformer free energy:  $u_{\text{tg}^+\text{g}^-} = \exp(-\Delta G_{\text{tg}^+\text{g}^-}/RT)$ , where  $\text{tg}^+\text{g}^-$  is the conformation in bonds 4–6 (viz., bonds 4, 5, and 6 are in the trans, gauche<sup>+</sup>, and gauche<sup>-</sup> states, respectively),  $R$  is the gas constant,  $T$  is the absolute temperature, and the  $\Delta G_{\text{tg}^+\text{g}^-}$  value was taken from that of E\_model.

## Appendix B. Statistical weight matrices of poly(propylene carbonate) (PPC).

The  $U$  matrices except  $U_6$  and  $U_e$  are the same as those of PEC. The  $U_6$  and  $U_e$  matrices of the ( $R$ )-orthodromic ( $T \rightarrow H$ ) form are expressed as

$$U_{\text{ortho}, 6}^R = U_{\text{ortho}, e}^R = \begin{matrix} & \begin{matrix} \text{t} & \text{g}^+ & \text{g}^- & \text{t} & \text{g}^+ & \text{g}^- & \text{t} & \text{g}^+ & \text{g}^- \end{matrix} \\ \begin{matrix} \text{t} & \text{t} \\ \text{t} & \text{g}^+ \\ \text{t} & \text{g}^- \\ \text{g}^+ & \text{t} \\ \text{g}^+ & \text{g}^+ \\ \text{g}^+ & \text{g}^- \\ \text{g}^- & \text{t} \\ \text{g}^- & \text{g}^+ \\ \text{g}^- & \text{g}^- \end{matrix} & \begin{pmatrix} u_1 & u_2 & u_3 & 0 & 0 & 0 & 0 & 0 & 0 \\ 0 & 0 & 0 & u_4 & u_5 & u_6 & 0 & 0 & 0 \\ 0 & 0 & 0 & 0 & 0 & 0 & u_7 & u_8 & u_9 \\ u_{10} & u_{11} & u_{12} & 0 & 0 & 0 & 0 & 0 & 0 \\ 0 & 0 & 0 & u_{13} & u_{14} & u_{15} & 0 & 0 & 0 \\ 0 & 0 & 0 & 0 & 0 & 0 & u_{16} & u_{17} & u_{18} \\ u_{19} & u_{20} & u_{21} & 0 & 0 & 0 & 0 & 0 & 0 \\ 0 & 0 & 0 & u_{22} & u_{23} & u_{24} & 0 & 0 & 0 \\ 0 & 0 & 0 & 0 & 0 & 0 & u_{25} & u_{26} & u_{27} \end{pmatrix} \end{matrix} \quad (\text{A16})$$

Here, the element is the Boltzmann factor of the free energy of the corresponding conformation; e.g.,  $u_6 = \exp(-\Delta G_{\text{tg}^+\text{g}^-}/RT)$ . The  $U_6$  and  $U_e$  matrices of the ( $S$ )-orthodromic ( $T \rightarrow H$ ) form can be derived from

$$U_{\text{ortho}, 6}^S = U_{\text{ortho}, e}^S = Q_9 (U_{\text{ortho}, 6}^R) Q_9 \quad (\text{A17})$$

where

$$Q_9 = Q_3 \otimes Q_3 \quad (\text{A18})$$

with

$$Q_3 = \begin{pmatrix} 1 & 0 & 0 \\ 0 & 0 & 1 \\ 0 & 1 & 0 \end{pmatrix} \quad (\text{A19})$$

The  $U_6$  and  $U_e$  matrices of the (R)-antidromic (H→T) form are given as

$$U_{\text{anti}, 6}^R = U_{\text{anti}, e}^R = \begin{matrix} & \begin{matrix} t & g^+ & g^- & t & g^+ & g^- & t & g^+ & g^- \end{matrix} \\ \begin{matrix} t & t \\ t & g^+ \\ t & g^- \\ g^+ & t \\ g^+ & g^+ \\ g^+ & g^- \\ g^- & t \\ g^- & g^+ \\ g^- & g^- \end{matrix} & \begin{pmatrix} u_1 & u_{10} & u_{19} & 0 & 0 & 0 & 0 & 0 & 0 \\ 0 & 0 & 0 & u_4 & u_{13} & u_{22} & 0 & 0 & 0 \\ 0 & 0 & 0 & 0 & 0 & 0 & u_7 & u_{16} & u_{25} \\ u_2 & u_{11} & u_{20} & 0 & 0 & 0 & 0 & 0 & 0 \\ 0 & 0 & 0 & u_5 & u_{14} & u_{23} & 0 & 0 & 0 \\ 0 & 0 & 0 & 0 & 0 & 0 & u_8 & u_{17} & u_{26} \\ u_3 & u_{12} & u_{21} & 0 & 0 & 0 & 0 & 0 & 0 \\ 0 & 0 & 0 & u_6 & u_{15} & u_{24} & 0 & 0 & 0 \\ 0 & 0 & 0 & 0 & 0 & 0 & u_9 & u_{18} & u_{27} \end{pmatrix} \end{matrix} \quad (\text{A20})$$

The elements here,  $u_1 - u_{27}$ , are the same as those in eq A16. The  $U_6$  and  $U_e$  matrices of the (S)-antidromic (H→T) form can be derived from

$$U_{\text{anti}, 6}^S = U_{\text{anti}, e}^S = Q_9 \left( U_{\text{anti}, 6}^R \right) Q_9 \quad (\text{A21})$$

**Table S1. Geometrical Parameters of PEC, Used in the Refined RIS Calculations<sup>a</sup>**

| conformation   |                |                |         |                           |                           |            |
|----------------|----------------|----------------|---------|---------------------------|---------------------------|------------|
| bond           |                |                |         |                           |                           |            |
| $j-1$          | $j$            | $j+1$          | $l_j^b$ | $\angle j \wedge (j+1)^c$ | $\angle (j-1) \wedge j^d$ | $\phi_j^e$ |
| bond a         |                |                |         |                           |                           |            |
| t              | t              | t              | 1.336   | 107.9                     | 114.9                     | 0.0        |
| bond b         |                |                |         |                           |                           |            |
| t              | t              | t              | 1.341   | 115.1                     | 107.9                     | 0.0        |
|                | t              | g <sup>+</sup> | 1.343   | 116.1                     | 107.7                     | 0.3        |
|                | t              | g <sup>-</sup> | 1.343   | 116.1                     | 107.7                     | -0.3       |
| bond c (e)     |                |                |         |                           |                           |            |
| t              | t              | t              | 1.439   | 105.6                     | 115.1                     | 0.0        |
|                | g <sup>+</sup> |                | 1.439   | 109.6                     | 116.1                     | 91.1       |
|                | g <sup>-</sup> |                | 1.439   | 109.6                     | 116.1                     | -91.1      |
|                | t              | g <sup>+</sup> | 1.440   | 108.1                     | 115.0                     | -2.4       |
|                | g <sup>+</sup> |                | 1.441   | 112.6                     | 115.8                     | 95.0       |
|                | g <sup>-</sup> |                | 1.439   | 112.2                     | 115.6                     | -98.1      |
|                | t              | g <sup>-</sup> | 1.440   | 108.1                     | 115.0                     | 2.4        |
|                | g <sup>+</sup> |                | 1.439   | 112.2                     | 115.6                     | 98.1       |
|                | g <sup>-</sup> |                | 1.441   | 112.6                     | 115.8                     | -95.0      |
| bond d         |                |                |         |                           |                           |            |
| t              | t              | t              | 1.515   | 105.6                     | 105.6                     | 0.0        |
|                | g <sup>+</sup> |                | 1.504   | 108.1                     | 108.1                     | 108.4      |
|                | g <sup>-</sup> |                | 1.504   | 108.1                     | 108.1                     | -108.4     |
| g <sup>+</sup> | t              |                | 1.519   | 105.6                     | 109.6                     | 5.4        |
|                | g <sup>+</sup> |                | 1.509   | 108.0                     | 112.6                     | 111.9      |
|                | g <sup>-</sup> |                | -       | -                         | -                         | -          |
| g <sup>-</sup> | t              |                | 1.519   | 105.6                     | 109.6                     | -5.4       |
|                | g <sup>+</sup> |                | -       | -                         | -                         | -          |
|                | g <sup>-</sup> |                | 1.509   | 108.0                     | 112.6                     | -111.9     |
| t              | t              | g <sup>+</sup> | 1.519   | 109.6                     | 105.6                     | 5.4        |
|                | g <sup>+</sup> |                | 1.509   | 112.6                     | 108.0                     | 111.9      |
|                | g <sup>-</sup> |                | -       | -                         | -                         | -          |
| g <sup>+</sup> | t              |                | 1.522   | 108.8                     | 108.8                     | 12.3       |
|                | g <sup>+</sup> |                | 1.514   | 112.7                     | 112.7                     | 118.4      |
|                | g <sup>-</sup> |                | -       | -                         | -                         | -          |
| g <sup>-</sup> | t              |                | 1.523   | 109.8                     | 109.8                     | 0.0        |
|                | g <sup>+</sup> |                | 1.514   | 112.2                     | 110.5                     | 114.4      |
|                | g <sup>-</sup> |                | 1.514   | 110.5                     | 112.2                     | -114.4     |
| t              | t              | g <sup>-</sup> | 1.519   | 109.6                     | 105.6                     | -5.4       |
|                | g <sup>+</sup> |                | -       | -                         | -                         | -          |
|                | g <sup>-</sup> |                | 1.509   | 112.6                     | 108.0                     | -111.9     |
| g <sup>+</sup> | t              |                | 1.523   | 109.8                     | 109.8                     | 0.0        |
|                | g <sup>+</sup> |                | 1.514   | 110.5                     | 112.2                     | 114.4      |
|                | g <sup>-</sup> |                | 1.514   | 112.2                     | 110.5                     | -114.4     |
| g <sup>-</sup> | t              |                | 1.522   | 108.8                     | 108.8                     | -12.3      |
|                | g <sup>+</sup> |                | -       | -                         | -                         | -          |
|                | g <sup>-</sup> |                | 1.514   | 112.7                     | 112.7                     | -118.4     |

<sup>a</sup>Obtained from the geometrical optimization for E\_model at the B3LYP/6-311+G(2d,p) level. For the terminal CH<sub>3</sub>-O bonds, the bond length and bond angle were, respectively, set equal to 1.439 Å and 114.9°, and the 3-fold rotational symmetry was assumed.  $j$  denotes the current bond. <sup>b</sup>Length of bond  $j$ . <sup>c</sup>Angle formed between bonds  $j$  and  $j+1$ . <sup>d</sup>Angle formed between bonds  $j-1$  and  $j$ . <sup>e</sup>Dihedral angle of bond  $j$ . For the bond numbers, see Figure 1.

**Table S2. Geometrical Parameters of PPC, Used in the Refined RIS Calculations<sup>a</sup>**

| conformation   |                |                | bond   | $l_j^b$ | $\angle j \wedge (j+1)^c$ | $\phi_j^d$ |
|----------------|----------------|----------------|--------|---------|---------------------------|------------|
| $j-1$          | $j$            | $j+1$          |        |         |                           |            |
|                |                |                | bond a |         |                           |            |
| t              | t              | t              | 1.337  | 107.9   | 0.0                       |            |
|                |                |                | bond b |         |                           |            |
| t              | t              | t              | 1.340  | 115.2   | 0.1                       |            |
|                | t              | g <sup>+</sup> | 1.340  | 115.7   | -0.6                      |            |
|                | t              | g <sup>-</sup> | 1.343  | 116.2   | 0.6                       |            |
|                |                |                | bond c |         |                           |            |
| t              | t              | t              | 1.439  | 106.6   | -0.3                      |            |
|                | g <sup>+</sup> |                | -      | -       | -                         |            |
|                | g <sup>-</sup> |                | 1.439  | 110.4   | -89.1                     |            |
|                | t              | g <sup>+</sup> | 1.439  | 108.0   | -2.5                      |            |
|                | g <sup>+</sup> |                | 1.440  | 112.2   | 93.7                      |            |
|                | g <sup>-</sup> |                | 1.442  | 110.3   | -77.9                     |            |
|                | t              | g <sup>-</sup> | 1.440  | 109.2   | 3.0                       |            |
|                | g <sup>+</sup> |                | 1.440  | 111.2   | 74.8                      |            |
|                | g <sup>-</sup> |                | 1.441  | 111.9   | -67.0                     |            |
|                |                |                | bond d |         |                           |            |
| t              | t              | t              | 1.522  | 103.6   | 4.7                       |            |
|                | g <sup>+</sup> |                | 1.512  | 106.2   | 110.4                     |            |
|                | g <sup>-</sup> |                | 1.513  | 106.7   | -110.4                    |            |
| g <sup>+</sup> | t              |                | -      | -       | -                         |            |
|                | g <sup>+</sup> |                | 1.517  | 106.2   | 112.8                     |            |
|                | g <sup>-</sup> |                | -      | -       | -                         |            |
| g <sup>-</sup> | t              |                | 1.527  | 103.5   | 1.4                       |            |
|                | g <sup>+</sup> |                | -      | -       | -                         |            |
|                | g <sup>-</sup> |                | 1.517  | 106.8   | -111.9                    |            |
| t              | t              | g <sup>+</sup> | 1.527  | 110.7   | 21.1                      |            |
|                | g <sup>+</sup> |                | 1.517  | 112.7   | 120.4                     |            |
|                | g <sup>-</sup> |                | 1.518  | 110.3   | -104.2                    |            |
| g <sup>+</sup> | t              |                | -      | -       | -                         |            |
|                | g <sup>+</sup> |                | 1.523  | 112.4   | 124.9                     |            |
|                | g <sup>-</sup> |                | -      | -       | -                         |            |
| g <sup>-</sup> | t              |                | 1.532  | 111.0   | 17.3                      |            |
|                | g <sup>+</sup> |                | 1.522  | 111.3   | 111.9                     |            |
|                | g <sup>-</sup> |                | 1.523  | 110.1   | -111.9                    |            |
| t              | t              | g <sup>-</sup> | 1.524  | 106.9   | 3.1                       |            |
|                | g <sup>+</sup> |                | 1.512  | 106.2   | 110.4                     |            |
|                | g <sup>-</sup> |                | 1.518  | 110.5   | -113.1                    |            |
| g <sup>+</sup> | t              |                | -      | -       | -                         |            |
|                | g <sup>+</sup> |                | 1.522  | 108.2   | 120.8                     |            |
|                | g <sup>-</sup> |                | 1.522  | 109.9   | -114.4                    |            |
| g <sup>-</sup> | t              |                | -      | -       | -                         |            |
|                | g <sup>+</sup> |                | -      | -       | -                         |            |
|                | g <sup>-</sup> |                | 1.522  | 110.7   | -115.5                    |            |
|                |                |                | bond e |         |                           |            |
| t              | t              | t              | 1.452  | 116.5   | -30.0                     |            |
|                | g <sup>+</sup> |                | 1.455  | 119.1   | 116.6                     |            |
|                | g <sup>-</sup> |                | 1.452  | 116.7   | -92.4                     |            |
| g <sup>+</sup> | t              |                | 1.452  | 116.5   | -31.1                     |            |
|                | g <sup>+</sup> |                | 1.455  | 119.5   | 116.7                     |            |
|                | g <sup>-</sup> |                | 1.449  | 116.9   | -76.6                     |            |
| g <sup>-</sup> | t              |                | 1.454  | 116.2   | -31.2                     |            |
|                | g <sup>+</sup> |                | 1.456  | 122.2   | 90.5                      |            |
|                | g <sup>-</sup> |                | 1.453  | 116.5   | -97.9                     |            |

<sup>a</sup>Obtained from the geometrical optimization for (*R*)-P\_model at the B3LYP/6-311+G(2d,p) level. For the terminal CH<sub>3</sub>-O bonds, the bond length and bond angle were, respectively, set equal to 1.439 Å and 114.9°, and the 3-fold rotational symmetry was assumed. *j* denotes the current bond. <sup>b</sup>Length of bond *j*. <sup>c</sup>Angle formed between bonds *j* and *j* + 1. <sup>d</sup>Dihedral angle of bond *j*. For the bond numbers, see Figure 1.

**Table S3. Fractions of Reigo- and Stereosequences in Bernoulli and Markov Statistics for PPC**

| probability <sup>a</sup> |      | stereosequence |      |      |             |               |           |           |           |           |  |
|--------------------------|------|----------------|------|------|-------------|---------------|-----------|-----------|-----------|-----------|--|
|                          |      | regiosequence  |      |      | diad        |               | triad     |           |           |           |  |
|                          |      | H-T            | H-H  | T-T  | <i>meso</i> | <i>racemo</i> | <i>mm</i> | <i>mr</i> | <i>rm</i> | <i>rr</i> |  |
| Bernoulli                | 0.00 | 1.00           | 0.00 | 0.00 | 1.00        | 0.00          | 1.00      | 0.00      | 0.00      | 0.00      |  |
|                          | 0.10 | 0.82           | 0.09 | 0.09 | 0.82        | 0.18          | 0.73      | 0.09      | 0.09      | 0.09      |  |
|                          | 0.20 | 0.68           | 0.16 | 0.16 | 0.68        | 0.32          | 0.52      | 0.16      | 0.16      | 0.16      |  |
|                          | 0.30 | 0.58           | 0.21 | 0.21 | 0.58        | 0.42          | 0.37      | 0.21      | 0.21      | 0.21      |  |
|                          | 0.40 | 0.52           | 0.24 | 0.24 | 0.52        | 0.48          | 0.28      | 0.24      | 0.24      | 0.24      |  |
|                          | 0.50 | 0.50           | 0.25 | 0.25 | 0.50        | 0.50          | 0.25      | 0.25      | 0.25      | 0.25      |  |
|                          | 0.60 | 0.52           | 0.24 | 0.24 | 0.52        | 0.48          | 0.28      | 0.24      | 0.24      | 0.24      |  |
|                          | 0.70 | 0.58           | 0.21 | 0.21 | 0.58        | 0.42          | 0.37      | 0.21      | 0.21      | 0.21      |  |
|                          | 0.80 | 0.68           | 0.16 | 0.16 | 0.68        | 0.32          | 0.52      | 0.16      | 0.16      | 0.16      |  |
|                          | 0.90 | 0.82           | 0.09 | 0.09 | 0.82        | 0.18          | 0.73      | 0.09      | 0.09      | 0.09      |  |
| 1.00                     | 1.00 | 0.00           | 0.00 | 1.00 | 0.00        | 1.00          | 0.00      | 0.00      | 0.00      |           |  |
| Markov                   | 0.00 | 0.00           | 0.50 | 0.50 | 0.00        | 1.00          | 0.00      | 0.00      | 0.00      | 1.00      |  |
|                          | 0.10 | 0.10           | 0.45 | 0.45 | 0.10        | 0.90          | 0.01      | 0.09      | 0.09      | 0.81      |  |
|                          | 0.20 | 0.20           | 0.40 | 0.40 | 0.20        | 0.80          | 0.04      | 0.16      | 0.16      | 0.64      |  |
|                          | 0.30 | 0.30           | 0.35 | 0.35 | 0.30        | 0.70          | 0.09      | 0.21      | 0.21      | 0.49      |  |
|                          | 0.40 | 0.40           | 0.30 | 0.30 | 0.40        | 0.60          | 0.16      | 0.24      | 0.24      | 0.36      |  |
|                          | 0.50 | 0.50           | 0.25 | 0.25 | 0.50        | 0.50          | 0.25      | 0.25      | 0.25      | 0.25      |  |
|                          | 0.60 | 0.60           | 0.20 | 0.20 | 0.60        | 0.40          | 0.36      | 0.24      | 0.24      | 0.16      |  |
|                          | 0.70 | 0.70           | 0.15 | 0.15 | 0.70        | 0.30          | 0.49      | 0.21      | 0.21      | 0.09      |  |
|                          | 0.80 | 0.80           | 0.10 | 0.10 | 0.80        | 0.20          | 0.64      | 0.16      | 0.16      | 0.04      |  |
|                          | 0.90 | 0.90           | 0.05 | 0.05 | 0.90        | 0.10          | 0.81      | 0.09      | 0.09      | 0.01      |  |
| 1.00                     | 1.00 | 0.00           | 0.00 | 1.00 | 0.00        | 1.00          | 0.00      | 0.00      | 0.00      |           |  |

<sup>a</sup> For the Bernoulli trial,  $p_{\text{ortho}}$  (regiosequence) and  $p_R$  (stereosequence). For the Markov process,  $p_{\text{H-T}}$  (regiosequence) and  $p_{\text{meso}}$  (stereosequence).
